# Supplementary material
Source: Springer Nature journal article supplement (https://www.springermedizin.de/resource/supplementary/12955_2010_792_MOESM3_ESM.pdf/9561258)

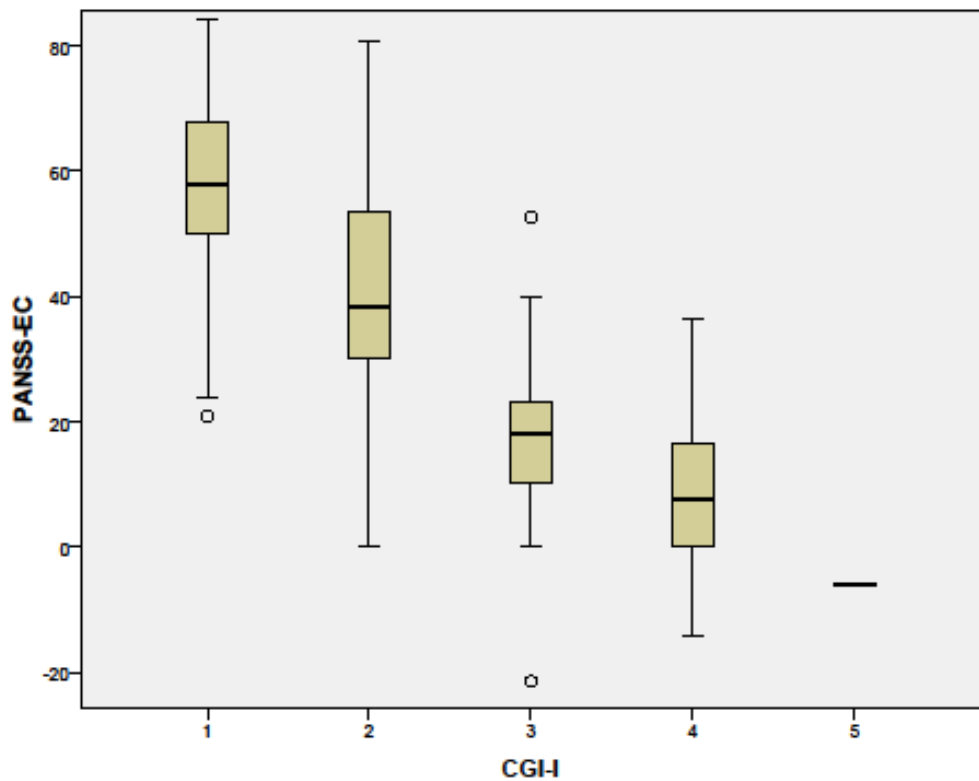

Supplement: MOESM3 [file 9561258]
